# Supplementary material for: Clinically approved PEGylated nanoparticles are covered by a protein corona that boosts the uptake by cancer cells
Source: Royal Society of Chemistry journal article supplement (doi:10.1039/c7nr03042h), 2017-01-01
Supplement: c7nr03042h1.pdf [file c7nr03042h1.pdf]

**Clinically approved PEGylated nanoparticles are covered by a protein corona that boosts uptake  
by cancer cells**

M. Papi<sup>a§</sup>, D. Caputo<sup>b§</sup>, V. Palmieri,<sup>a</sup> R. Coppola,<sup>b</sup> S. Palchetti,<sup>c,d</sup> F. Bugli,<sup>e</sup> C. Martini,<sup>e</sup> L.  
Digiacoimo,<sup>c,f</sup> D. Pozzi<sup>c,d\*</sup> and G. Caracciolo<sup>c\*</sup>

<sup>a</sup>Istituto di Fisica, Università Cattolica del Sacro Cuore, Largo F. Vito 1, 00168 Rome, Italy

<sup>b</sup>University Campus Bio-Medico di Roma, Via Alvaro del Portillo 200, 00128 Rome, Italy

<sup>c</sup>Department of Molecular Medicine, “Sapienza” University of Rome, Viale Regina Elena 291,  
00161 Rome, Italy

<sup>d</sup>Istituti Fisioterapici Ospitalieri, Istituto Regina Elena, Via Elio Chianesi 53,  
00144 Rome, Italy.

<sup>e</sup>Istituto di Microbiologia, Università Cattolica del Sacro Cuore, Largo F. Vito 1, 00168 Rome, Italy

<sup>f</sup>Department of Bioscience and Biotechnology, University of Camerino, Via Gentile III da Varano,  
62032 Camerino, MC, Italy

<sup>§</sup>equal contribution

E-mail: giulio.caracciolo@uniroma1.it; daniela.pozzi@uniroma1.it

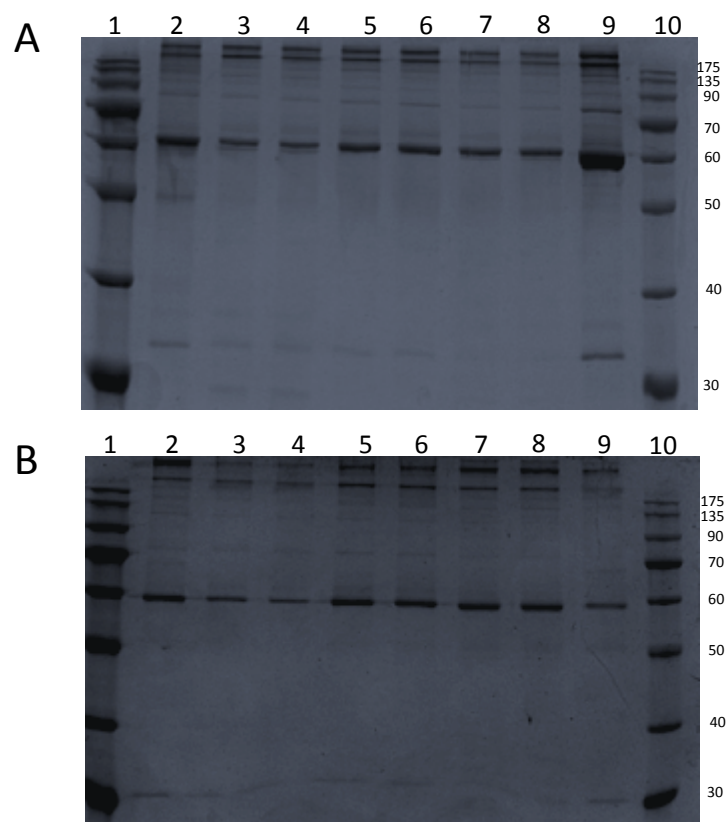

**Figure S1.** Representative one-dimensional SDS-PAGE gel of plasma proteins obtained from Onivyde (**A**) and “unPEGylated Onivyde” (**B**) following 1-hour incubation with plasma of four pancreatic ductal adenocarcinoma (PDAC) patients. (lane 2: patient “P1”; lanes 3-4: patient “P2”; lanes 5-6: patient “P3”; lanes 7-8: patient “P4”; lane 9: patient “P1”). The molecular weights (kDa) of the proteins on the standard ladder are reported on lanes 1 and 10 (the amount of ladder in lane 1 is double that of lane 10).

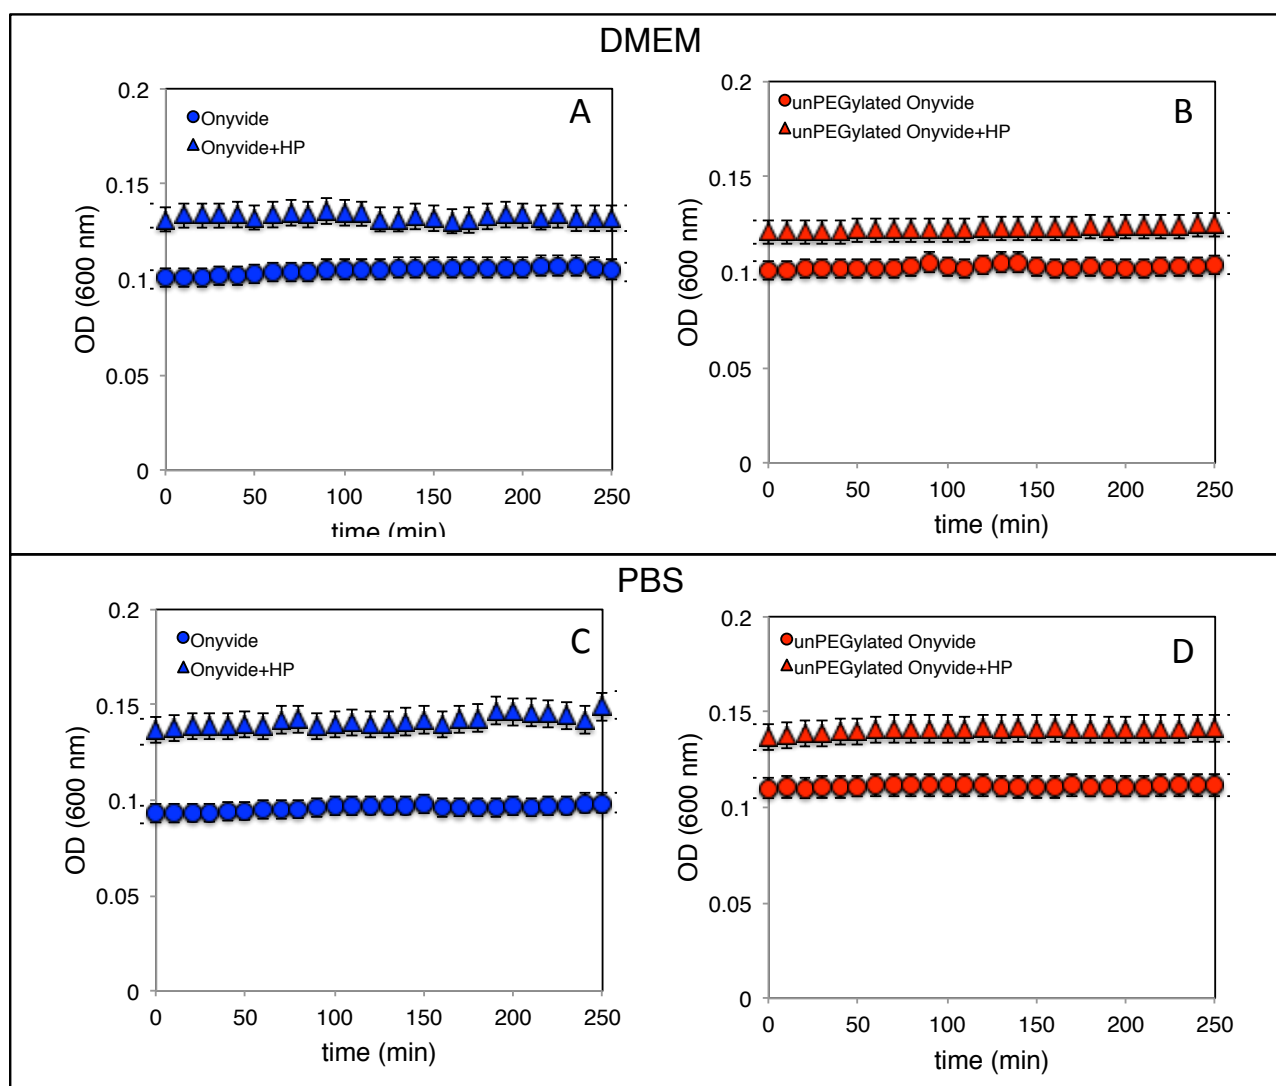

**Figure S2.** Temporal aggregation and sedimentation of liposomes and liposome-protein corona (PC) in Phosphate-buffered saline (PBS) and cell culture medium (Dulbecco's modified Eagle's medium, DMEM) were explored by measuring Optical Density (OD) at 600 nm. OD measurements were performed by means of a Cytation 3 multimode reader (Biotek, USA). To this end, 10  $\mu$ L of each sample has been re-suspended in a final volume of 100  $\mu$ L of PBS or DMEM and OD has been measured every 10 minutes for 4 hours. Measurements have been done in triplicate, PBS or RPMI alone have been use as blanks. Results are given as average  $\pm$  standard deviation (S.D.).

**Table S1.** Inclusion criteria in healthy and pancreatic cancer group.

| <b>PANCREATIC CANCER GROUP</b>                                                                        |
|-------------------------------------------------------------------------------------------------------|
| 1) Age $\geq$ 18 years                                                                                |
| 2) Cyto-histologically proven diagnosis of pancreatic adenocarcinoma                                  |
| 3) Personal medical history negative for neoplastic, renal or liver disease or blood disorders        |
| 4) Adequate renal function: creatinine $<1.5$ mg/dl, blood urea nitrogen $<1.5$ times the upper limit |
| 5) Absence of uncontrolled infections                                                                 |
| 6) Written informed consent                                                                           |
| 7) No previous chemotherapy or radiotherapy                                                           |

**Table S2.** Clinical/pathological stage in pancreatic cancer patients group.

| Stage of pancreatic cancer | N. |
|----------------------------|----|
| cT2N+M0                    | 1  |
| cT3N+M0                    | 2  |
| cT4N+M0                    | 1  |
| cT2N+M+                    | 1  |
| cT3N+M+                    | 2  |
| cT4N+M+                    | 1  |
| pT3N1MxG2                  | 2  |
